# Supplementary material for: An all-in-one platform to deplete pathogenic bacteria for rapid and safe enrichment of plant-derived extracellular vesicles
Source: Royal Society of Chemistry journal article supplement (doi:10.1039/d3lc00585b), 2023-01-01
Supplement: d3lc00585b2.pdf [file d3lc00585b2.pdf]

1 **Electronic Supplementary information (ESI)**

2

3 **An all-in-one platform to deplete pathogenic bacteria for rapid and safe**  
4 **enrichment of plant-derived extracellular vesicles**

5

6 Zhihao Wen<sup>‡a</sup>, Jianning Yu<sup>‡ab</sup>, Hyorim Jeong<sup>c</sup>, Dong-Uk Kim<sup>a</sup>, Ji Yeong Yang<sup>ac</sup>, Kyung-A Hyun<sup>a</sup>,  
7 Seoyeon Choi<sup>\*ac</sup>, Sunyoung Park<sup>\*ac</sup>, and Hyo-Il Jung<sup>\*ac</sup>

8

9 <sup>a</sup> School of Mechanical Engineering, Yonsei University, 50 Yonsei-ro, Seodaemun-gu, Seoul, 120-749,  
10 Republic of Korea

11 <sup>b</sup> Department of Biomedical Laboratory Science, Yonsei University, Republic of Korea

12 <sup>c</sup> The DABOM Incorporation, 50 Yonsei-ro, Seodaemun-gu, Seoul, 120-749, Republic of Korea

13

14 <sup>‡</sup> These authors contributed equally to this work.

15 <sup>\*</sup> Author to whom correspondence should be addressed: Corresponding authors at: School of Mechanical  
16 Engineering, Yonsei University, 50 Yonsei-ro, Seodaemun-gu, Seoul, 03722, Republic of Korea

17 E-mail address: uridle7@yonsei.ac.kr (H. I. Jung), angelsy88@gmail.com (S. Park),

18 sschoiyy@yonsei.ac.kr (S. Choi)

19

## 20 **Additional Experimental Section**

### 21 **Design of retractable pen-like structure**

22 The structure of the push-type part is based on the principle of the original ballpoint pen. It is composed  
23 of a 3D-printed shell, internal snap-in, and springs, and the whole structure is designed according to the  
24 desired stop position. When force is used to press down on it, the card slot will be stuck.

### 25 **Preparation of Biotinylated Con A**

26 Con A was completely dispersed in PBS buffer, for the preparation of 1mg/ml Con A. The size of Con  
27 A and biotin are calculated, and through spatial analysis, the maximum amount of biotin that can be  
28 geometrically attached to Con A. 8.5mM NHS-PEG4 Biotin solution was added to a 1.5mL tube to make  
29 100uL Biotin-Con A solution and leave at room temperature for 30min. The Desalting column is used  
30 for the following centrifugation steps. 100uL Biotin-Con A solution was added and centrifuge again at  
31 1500g for 2 min. Then it was kept refrigerated at 4C°. And a Pierce Biotin Quantitation Kit (Thermo  
32 Scientific, USA) was used to test the prepared Biotinylated Con A.

### 33 **Bacterial culture**

34 The *S.aureus* and *C.albicans* reference strains of were purchased from the American Type Culture  
35 Collection (ATCC, Manassas, VA, USA) *S.aureus* and *C.albicans* were grown on nutrient agar plate (BD  
36 Biosciences, Franklin Lakes, NJ, USA) under microaerophilic and 100 percent humidity conditions at  
37 37°C and inspected after overnight

### 38 **Cell culture**

39 Human epidermal keratinocytes cells (HaCaT) were obtained from the American Type Culture  
40 Collection (ATCC, Manassas, VA, USA), The cells were cultured in Dulbecco's Modified Eagle Medium  
41 (DMEM) (Gibco, Thermo Fisher Scientific) containing 10% fetal bovine serum (Gibco, Thermo Fisher  
42 Scientific), and 1% Phosphate buffered saline (tablet) (Sigma Aldrich). The cells were cultured at 37°C  
43 in a humidified 5% CO<sub>2</sub> atmosphere.

### 44 **Nanoparticle tracking analysis (NTA)**

45 Extracellular Vesicles isolated from Fresh Licorice and Licorice extract and the Purified Fresh Licorice  
46 were subjected to the Nanoparticle tracking analysis, using a Nano-Sight LM10 (Malvern Instruments  
47 Ltd., UK). The basic data about the processed particles that can be acquired by this method include  
48 average size, modal value, and size distribution. These parameters were analyzed by the NTA 3.3

49 analytical software according to the manufacture's protocol. Settings were optimized and kept constant  
50 between samples. The Brownian movements of particles (Extracellular Vesicles) present in the sample  
51 were subjected to a laser beam, recorded by a camera, and converted into size and concentration  
52 parameters by NTA through the Stokes-Einstein equation. Every sample was measured in triplicate.

### 53 **Transmission electron microscopy (TEM)**

54 The morphological evaluation of the isolated Fresh Licorice EVs and Licorice extract EVs and the  
55 Purified Fresh Licorice EVs were performed by JEM-2100plus TEM (JEOL Inc., Japan). Briefly, the  
56 exosomes solution was dried in a copper grid with 200 mesh carbon films (CF200-Cu, Electron  
57 Microscopy Sciences, USA). Excess fluid was carefully removed with filter paper and grids negatively  
58 stained with 2 % (w/v) uranyl acetate for 5 min. The grids were air-dried, and TEM imaging was recorded.

### 59 **Cell viability assay**

60 HaCaT cells were seeded into flat-bottom 96-well plates at a concentration of  $1 \times 10^4$  cells per well for  
61 a cell viability assay. After overnight incubation, cells were treated with various concentrations of Fresh  
62 Licorice-derived EVs, Licorice extract-derived EVs and Purified Fresh Licorice EVs. The growth and  
63 viability of HaCaT cells were determined by the Cell Counting Kit-8 (CCK-8; GLPBIO, Montclair,  
64 California). The cells were washed twice with PBS after treatment. Absorbance was measured using a  
65 microplate reader (Molecular Devices, CA, USA) at 450 nm wavelength. The assay was repeated three  
66 times.

### 67 **Quantitative real-time polymerase chain reaction (qRT-PCR)**

68 Total DNA was extracted from bacterial using MagListo™ 5M Genomic DNA Extraction Kit (Bioneer,  
69 Korea). The Glyceraldehyde-phosphate dehydrogenase gene was used as the internal control to normalize  
70 the sample differences. Real-time PCR was performed using the SYBR Green Lo-ROX qPCR kit  
71 (Bioline, Cincinnati, OH, USA) and the QuantStudio™ 5 Platform (Thermo Fisher Scientific). Sample  
72 quantification for mRNA was performed according to the threshold cycle using the  $\Delta\Delta C_t$  method. The  
73 values presented in the graphs are mean  $\pm$  SD values.

74

75

76 **Supplementary Figures:**

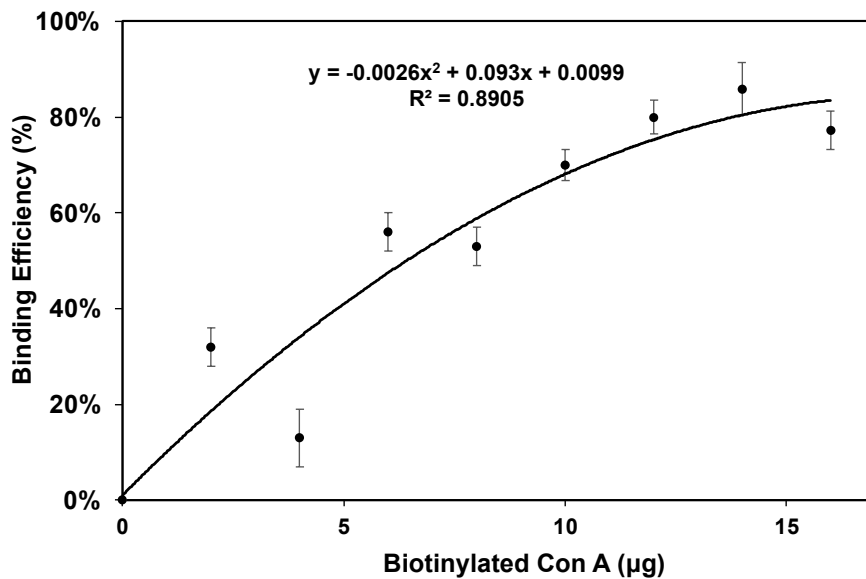

77

78 **Fig. S1** Binding efficiency of biotinylated Con A to magnetic beads.

79

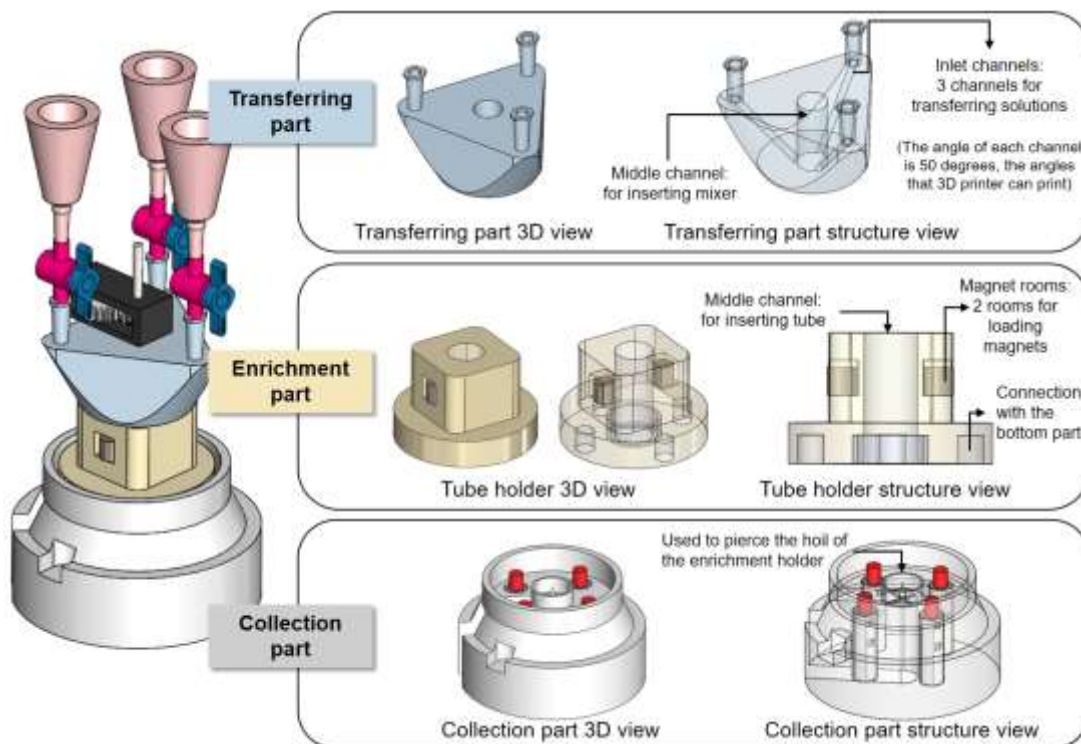

80

81 **Fig. S2** Structure design of core parts.

82

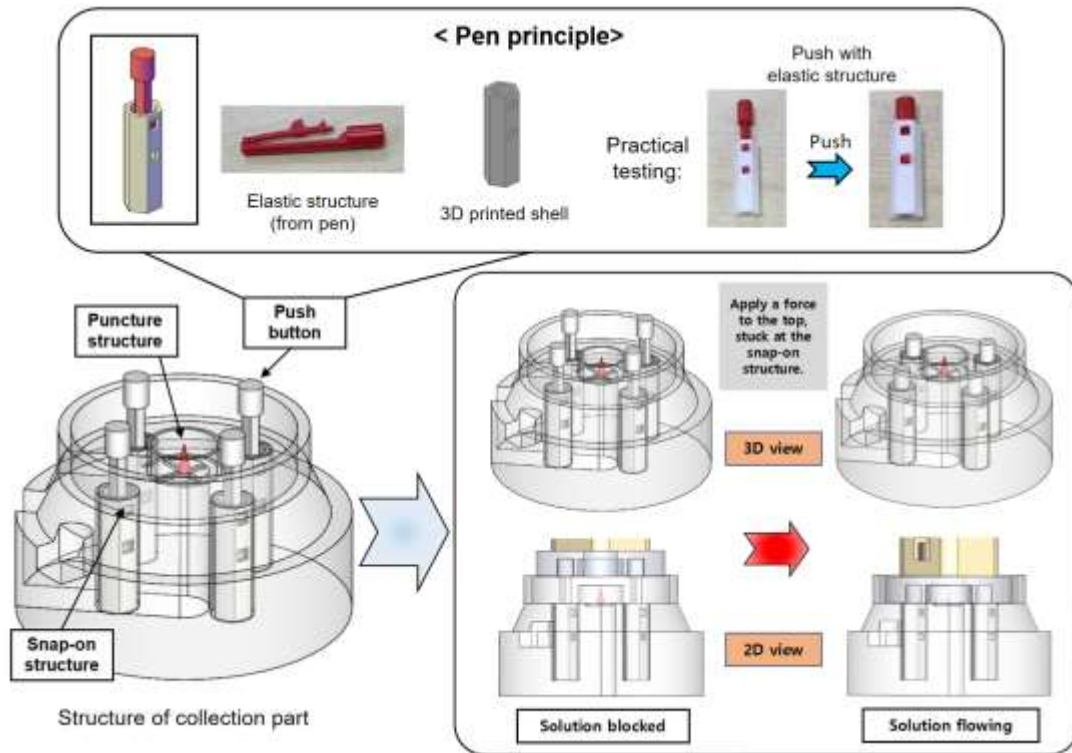

83

84 **Fig. S3** Working principle of the collection part.

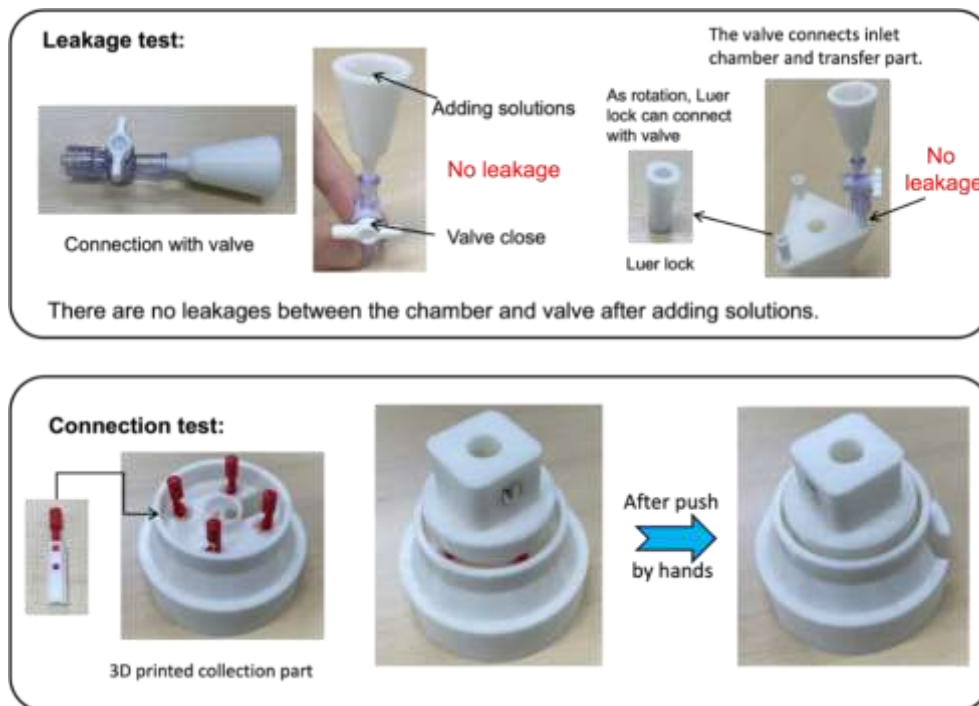

85

86 **Fig. S4** Leakage test of 3D-printed parts.

87

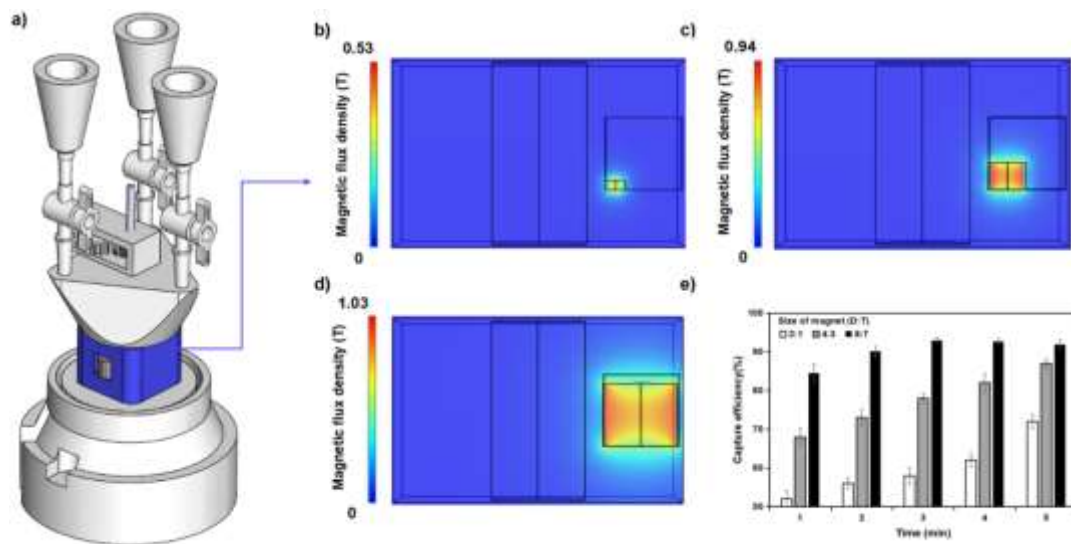

88

89 **Fig. S5** Schematic representation of enrichment holder for computational magnetic  
 90 fields. The magnetic fields were simulated for different magnetic sizes b) magnet ①  
 91 (Diameter: Thickness=2:1, pull force: 0.68N); c) magnet ② (Diameter: Thickness=4:3,  
 92 pull force: 3.4N); d) magnet ③ (Diameter: Thickness=8:7, pull force: 14.49N). And e)  
 93 the results of the simulation were confirmed by carrying out practical experiments.

94

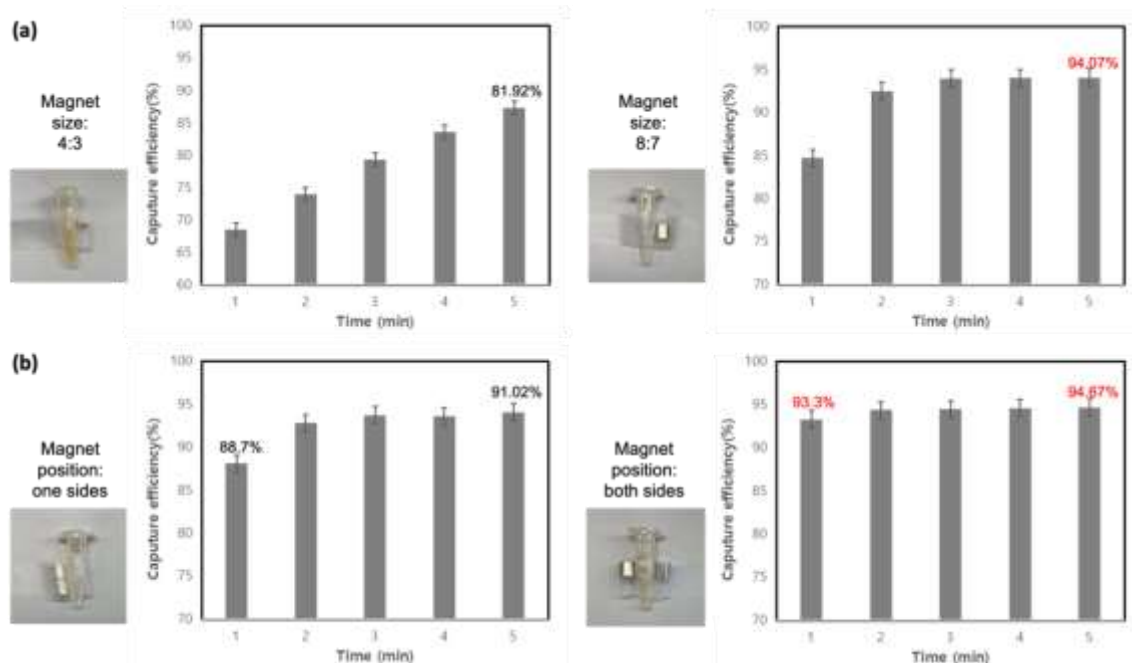

95

96 **Fig. S6** Magnet capture efficiency of different magnet sizes and positions.

97

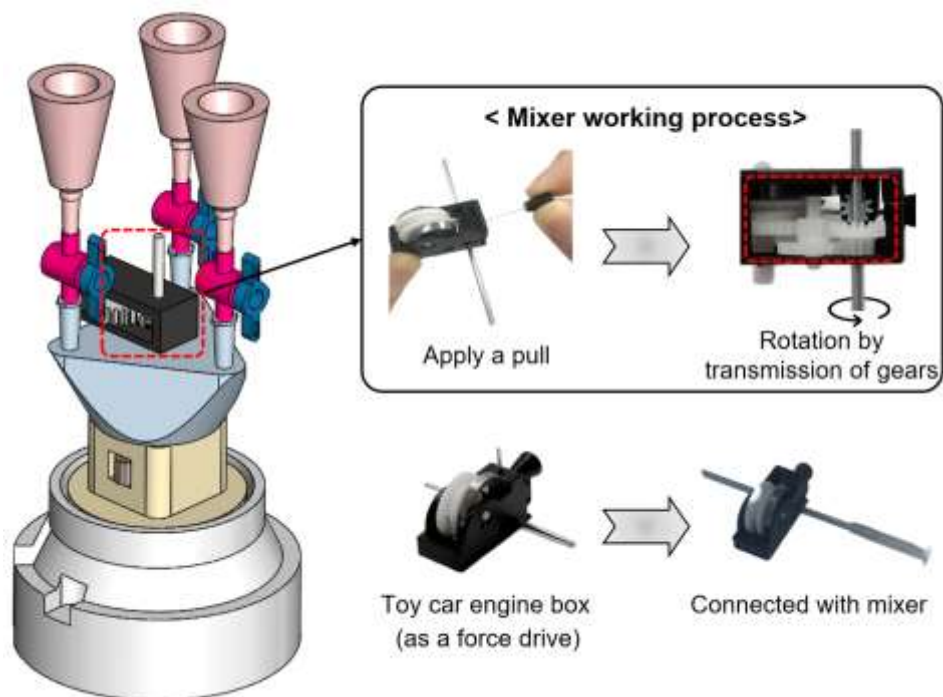

98

99 **Fig. S7** Combination and operation principle of the manual mixer.

100

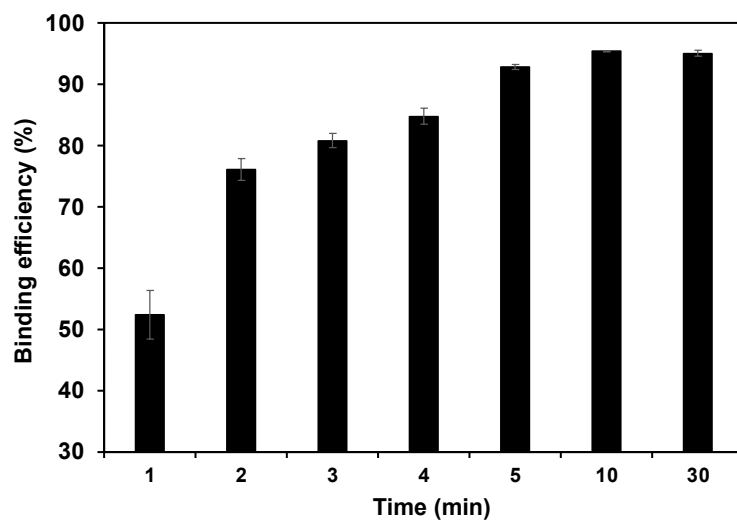

101

102 **Fig. S8** Binding efficiency of bacteria captured by Con A-coated magnetic beads.

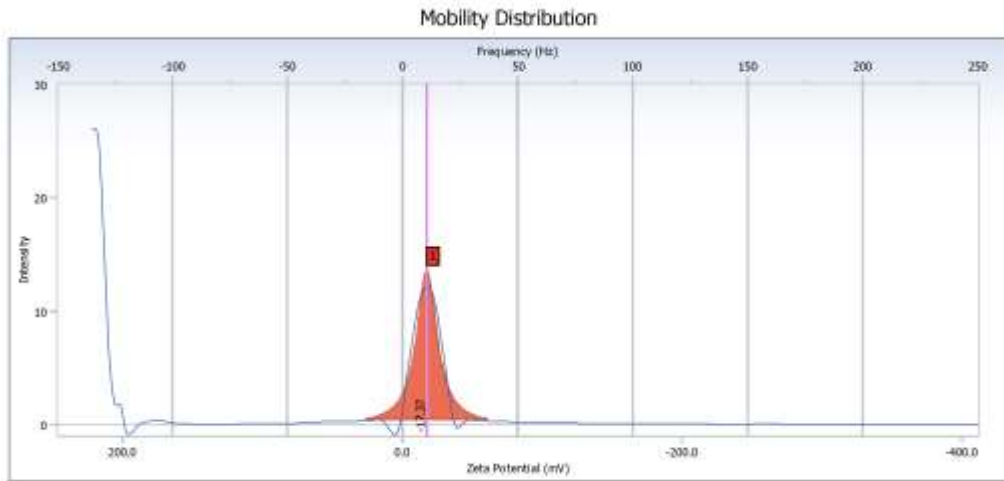

103

104 **Fig. S9** The zeta potential for LdEVs - non dep.

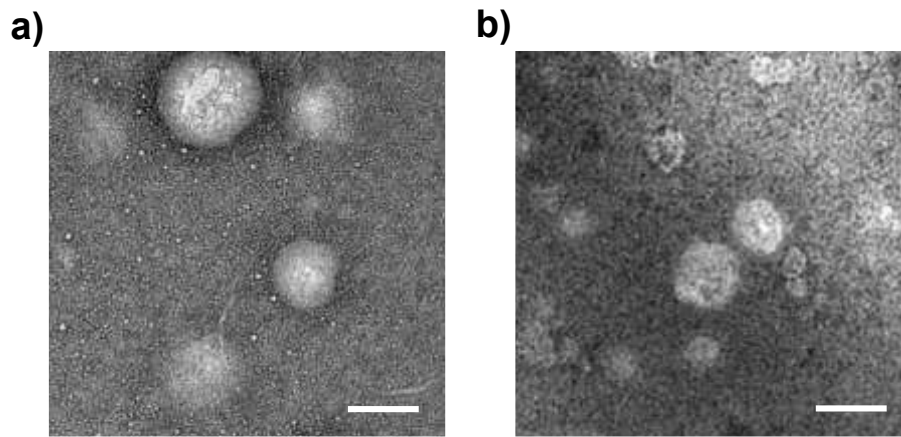

105

106 **Fig. S10** TEM images of a) LdEV non-dep. and b) LdEV dep. (scale bar:100nm)

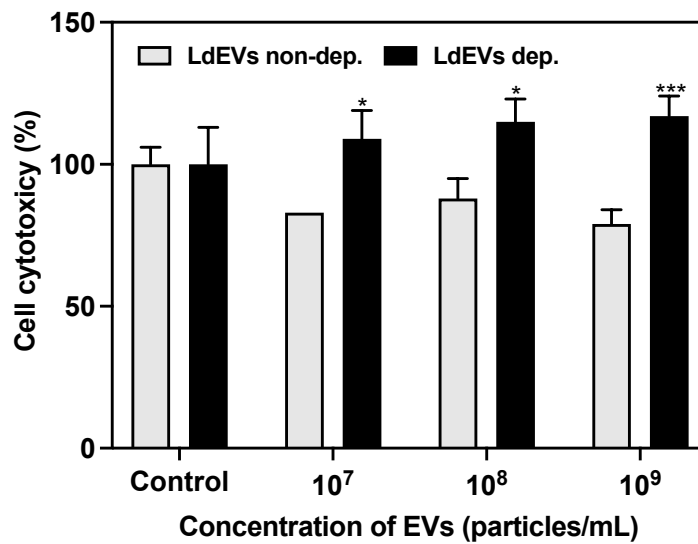

107

108 **Fig. S11** Cell viability assay was used to detect cell viability in HaCaT cells with LdEV

109 non-dep. and LdEV dep.



110 **Supplementary Tables**

111 Table S1. Specification comparison table of different magnets

| Magnet name    | Magnet ① | Magnet ② | Magnet ③ |
|----------------|----------|----------|----------|
| Diameter (mm)  | 2        | 4        | 8        |
| Thickness (mm) | 1        | 3        | 7        |
| Pull Force     | 0.68     | 3.40     | 14.49    |

112

113 Table S2. Comparison of conventional method and all-in-one platform

| Name                          | Conventional method                                                                                                                                                                                                                           | All-in-one platform                                                 |
|-------------------------------|-----------------------------------------------------------------------------------------------------------------------------------------------------------------------------------------------------------------------------------------------|---------------------------------------------------------------------|
| <b>Total Time</b>             | 120~180 min                                                                                                                                                                                                                                   | 15 min                                                              |
| Incubation Time               | 60~90 min                                                                                                                                                                                                                                     | 5 min                                                               |
| <b>Required facilities</b>    | Complex infrastructure Rocker, Shaker, Pipette, etc.                                                                                                                                                                                          | No other equipment                                                  |
| <b>Applicable environment</b> | Specialized environments, Laboratory, etc.                                                                                                                                                                                                    | Any environments                                                    |
| <b>Complexity</b>             | High, Cumbersome manual operation, etc.                                                                                                                                                                                                       | Easier to manufacture and operate                                   |
| <b>Preparation</b>            | Sample preparation process that adds complexity and cost                                                                                                                                                                                      | Little preparation                                                  |
| <b>Power needs</b>            | Yes                                                                                                                                                                                                                                           | No                                                                  |
| <b>Expertise</b>              | Highly need                                                                                                                                                                                                                                   | No expertise or infrastructure required; suitable for field testing |
| <b>Reference</b>              | Zheng, L., Wan, Y., Qi, P., et al. <i>Talanta</i> ,2017<br>Li Y Q, Zhu B, Li Y, et al. <i>Angewandte Chemie International Edition</i> , 2014<br>Idil, N., Perçin, I., Karakoç, V., et al. <i>Colloids and Surfaces B: Biointerfaces</i> ,2015 | This work                                                           |

114

115 Table S3. Nucleic acid sequences required to prepare DNA tetrahedron.

| Name          | Sequence (5' → 3')             |
|---------------|--------------------------------|
| C. albicans-F | TCT TTC TTG ATT TTG TGG GTG G  |
| C. albicans-R | TCG ATA GTC CCT CTA AGA AGT G  |
| S. aureus-F   | CAC CTG AAA CAA AGC ATC CTA AA |
| S. aureus-R   | CGC TAA GCC ACG TCC ATA TT     |
| E. coli-F     | CAT GCC GCG TGT ATG AAG AA     |
| E. coli-R     | CGG GTA ACG TCA ATG AGC AAA    |

116

117
